# Supplementary material
Source: PubMed Central journal article supplement (PMC5709205)
Supplement: NIHMS907663-supplement-Supplemental_Digital_Content.pdf [file NIHMS907663-supplement-Supplemental_Digital_Content.pdf]

### Appendix 1. Outcome Diagnosis Codes

| <b>Outcome</b>            | <b>ICD-9 Codes</b>                                                                                                                                             |
|---------------------------|----------------------------------------------------------------------------------------------------------------------------------------------------------------|
| Preeclampsia              | 642.4x-642.7x                                                                                                                                                  |
| Placental abruption       | 641.20, 641.21, 641.23                                                                                                                                         |
| Small for gestational age | 656.5x, 764.0x, 764.1x, 764.9x                                                                                                                                 |
| Preterm birth             | 362.20, 362.22, 362.23, 362.24, 362.25, 362.26, 362.27, 644.2x, 765.xx excluding 765.20 and 765.29, 774.2x, 776.6x, or CPT codes 00836, 49491, 49492, or 67229 |

Cohen JM, Hernandez-Diaz S, Bateman BT, Park Y, Desai RJ, Gray KJ, et al. Placental complications associated with psychostimulant use in pregnancy. *Obstet Gynecol* 2017; 130. The authors provided this information as a supplement to their article.

**Appendix 2. Flow diagram of study sample selection. LMP, last menstrual period; AMP, amphetamine–dextroamphetamine; MPH, methylphenidate; ATX, atomoxetine.**

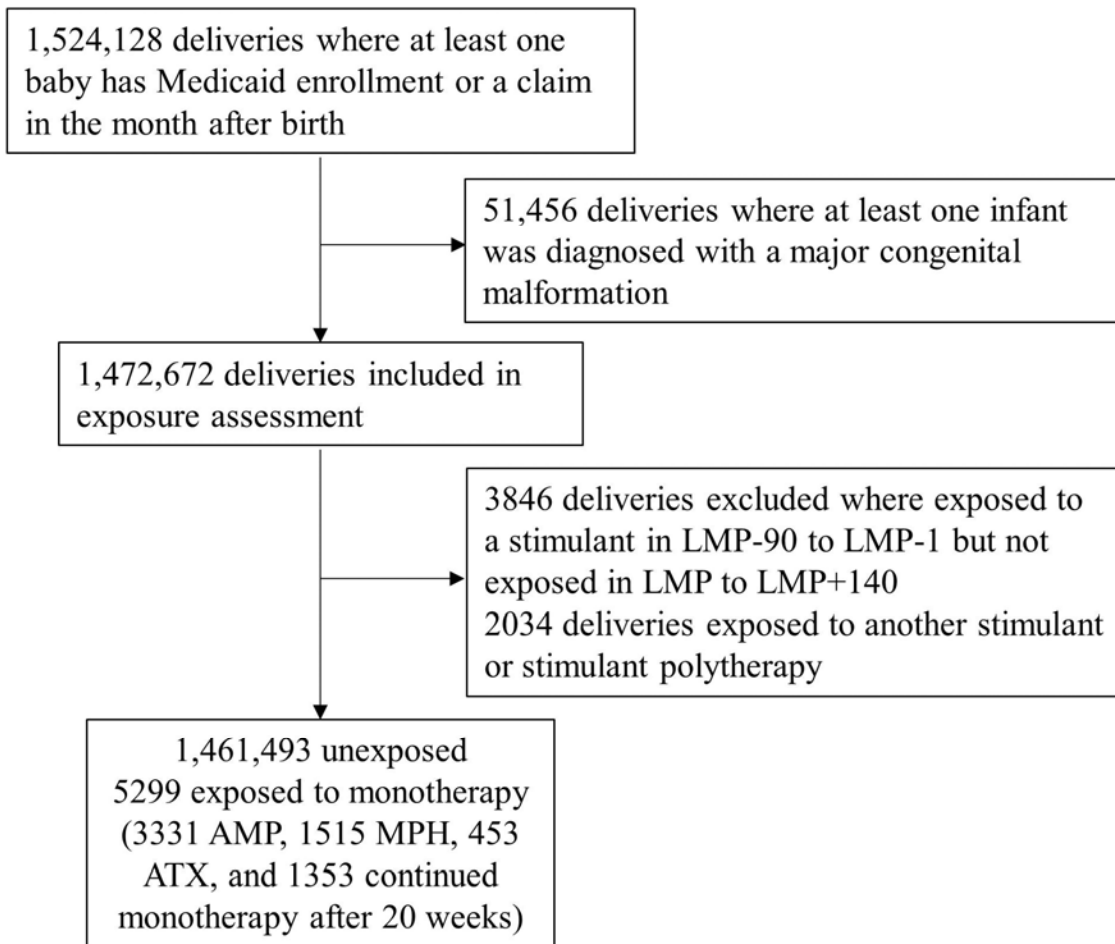

Cohen JM, Hernandez-Diaz S, Bateman BT, Park Y, Desai RJ, Gray KJ, et al. Placental complications associated with psychostimulant use in pregnancy. *Obstet Gynecol* 2017; 130. The authors provided this information as a supplement to their article.

**Appendix 3. Characteristics of Amphetamine–Dextroamphetamine–Exposed and Unexposed Reference Group**

|                                  | Unadjusted                               |      |                                      |      |           | Adjusted                                 |      |                                      |      |           |
|----------------------------------|------------------------------------------|------|--------------------------------------|------|-----------|------------------------------------------|------|--------------------------------------|------|-----------|
|                                  | No Stimulant Use<br>LMP-90 to<br>LMP+140 |      | AMP<br>Monotherapy<br>LMP to LMP+140 |      | St. Diff. | No Stimulant Use<br>LMP-90 to<br>LMP+140 |      | AMP<br>Monotherapy<br>LMP to LMP+140 |      | St. Diff. |
|                                  | N                                        | %    | N                                    | %    |           | N                                        | %    | N                                    | %    |           |
| <b>Total</b>                     | 1461493                                  |      | 3331                                 |      |           | 1417790                                  |      | 3328                                 |      |           |
| <b>Calendar year at delivery</b> |                                          |      |                                      |      |           |                                          |      |                                      |      |           |
| 2000                             | 1811                                     | 0.1  | 0                                    | 0.0  | 0.05      | 0.0                                      | 0.0  | 0                                    | 0.0  |           |
| 2001                             | 92450                                    | 6.3  | 26                                   | 0.8  | 0.30      | 11544.8                                  | 0.8  | 26                                   | 0.8  | 0.00      |
| 2002                             | 108062                                   | 7.4  | 68                                   | 2.0  | 0.25      | 28032.3                                  | 2.0  | 68                                   | 2.0  | 0.00      |
| 2003                             | 139585                                   | 9.6  | 113                                  | 3.4  | 0.25      | 47640.2                                  | 3.4  | 113                                  | 3.4  | 0.00      |
| 2004                             | 167258                                   | 11.4 | 165                                  | 5.0  | 0.24      | 71076.8                                  | 5.0  | 165                                  | 5.0  | 0.00      |
| 2005                             | 167285                                   | 11.5 | 267                                  | 8.0  | 0.12      | 118054.3                                 | 8.3  | 267                                  | 8.0  | 0.01      |
| 2006                             | 168389                                   | 11.5 | 340                                  | 10.2 | 0.04      | 145031.0                                 | 10.2 | 340                                  | 10.2 | 0.00      |
| 2007                             | 153209                                   | 10.5 | 410                                  | 12.3 | -0.06     | 178879.5                                 | 12.6 | 410                                  | 12.3 | 0.01      |
| 2008                             | 154732                                   | 10.6 | 503                                  | 15.1 | -0.14     | 217570.5                                 | 15.4 | 501                                  | 15.1 | 0.01      |
| 2009                             | 157865                                   | 10.8 | 676                                  | 20.3 | -0.26     | 283831.6                                 | 20.0 | 675                                  | 20.3 | -0.01     |
| 2010                             | 150847                                   | 10.3 | 763                                  | 22.9 | -0.34     | 316129.1                                 | 22.3 | 763                                  | 22.9 | -0.02     |
| <b>Region</b>                    |                                          |      |                                      |      |           |                                          |      |                                      |      |           |
| Midwest                          | 445121                                   | 30.5 | 1547                                 | 46.4 | -0.33     | 655421.8                                 | 46.2 | 1546                                 | 46.5 | 0.00      |
| Northeast                        | 232711                                   | 15.9 | 414                                  | 12.4 | 0.10      | 178439.2                                 | 12.6 | 414                                  | 12.4 | 0.00      |
| South                            | 395275                                   | 27.1 | 1170                                 | 35.1 | -0.18     | 502941.7                                 | 35.5 | 1168                                 | 35.1 | 0.01      |
| West                             | 388386                                   | 26.6 | 200                                  | 6.0  | 0.58      | 80987.3                                  | 5.7  | 200                                  | 6.0  | -0.01     |
| <b>Age at delivery</b>           |                                          |      |                                      |      |           |                                          |      |                                      |      |           |
| ≤19                              | 351638                                   | 24.1 | 1188                                 | 35.7 | -0.26     | 549553.3                                 | 38.8 | 1188                                 | 35.7 | 0.06      |
| 20-24                            | 511333                                   | 35.0 | 896                                  | 26.9 | 0.18      | 367242.3                                 | 25.9 | 894                                  | 26.9 | -0.02     |
| 25-29                            | 343902                                   | 23.5 | 733                                  | 22.0 | 0.04      | 294640.5                                 | 20.8 | 732                                  | 22.0 | -0.03     |

Cohen JM, Hernandez-Diaz S, Bateman BT, Park Y, Desai RJ, Gray KJ, et al. Placental complications associated with psychostimulant use in pregnancy. *Obstet Gynecol* 2017; 130. The authors provided this information as a supplement to their article.

©2017 American College of Obstetricians and Gynecologists.

|                                             |         |      |      |      |       |           |      |      |      |       |
|---------------------------------------------|---------|------|------|------|-------|-----------|------|------|------|-------|
| 30-34                                       | 162968  | 11.2 | 346  | 10.4 | 0.02  | 139624.6  | 9.9  | 346  | 10.4 | -0.02 |
| 35-39                                       | 72540   | 5.0  | 142  | 4.3  | 0.03  | 56117.5   | 4.0  | 142  | 4.3  | -0.02 |
| ≥40                                         | 19112   | 1.3  | 26   | 0.8  | 0.05  | 10611.8   | 0.8  | 26   | 0.8  | 0.00  |
| <b>Race/Ethnicity</b>                       |         |      |      |      |       |           |      |      |      |       |
| White                                       | 581811  | 39.8 | 2747 | 82.5 | -0.97 | 1183498.7 | 83.5 | 2744 | 82.5 | 0.03  |
| Black/African American                      | 491124  | 33.6 | 293  | 8.8  | 0.64  | 118312.3  | 8.3  | 293  | 8.8  | -0.02 |
| Hispanic/Latino                             | 219666  | 15.0 | 68   | 2.0  | 0.48  | 26719.8   | 1.9  | 68   | 2.0  | -0.01 |
| Asian/Pacific Islander                      | 52161   | 3.6  | *    | 0.1  | 0.26  | 1912.7    | 0.1  | *    | 0.1  | 0.00  |
| American Indian                             | 26047   | 1.8  | 59   | 1.8  | 0.00  | 23990.3   | 1.7  | 59   | 1.8  | -0.01 |
| Other                                       | 59443   | 4.1  | 68   | 2.0  | 0.12  | 26602.2   | 1.9  | 68   | 2.0  | -0.01 |
| Unknown                                     | 31241   | 2.1  | 92   | 2.8  | -0.04 | 36753.9   | 2.6  | 92   | 2.8  | -0.01 |
| <b>Placental-Complications Risk Factors</b> |         |      |      |      |       |           |      |      |      |       |
| Multiparous                                 | 1104366 | 75.6 | 2019 | 60.6 | 0.32  | 818768.7  | 57.8 | 2016 | 60.6 | -0.06 |
| Multifetal gestation                        | 41956   | 2.9  | 71   | 2.1  | 0.05  | 27503.3   | 1.9  | 71   | 2.1  | -0.01 |
| Tobacco use                                 | 52913   | 3.6  | 349  | 10.5 | -0.27 | 153666.9  | 10.8 | 349  | 10.5 | 0.01  |
| Alcohol use                                 | 8891    | 0.6  | 45   | 1.4  | -0.08 | 21356.6   | 1.5  | 45   | 1.4  | 0.01  |
| Other drug abuse or dependence              | 21991   | 1.5  | 143  | 4.3  | -0.17 | 68316.4   | 4.8  | 142  | 4.3  | 0.03  |
| Rheumatoid arthritis                        | 1565    | 0.1  | *    | 0.2  | -0.03 | 2669.3    | 0.2  | *    | 0.2  | -0.01 |
| Fibromyalgia                                | 14246   | 1.0  | 97   | 2.9  | -0.14 | 40154.2   | 2.8  | 96   | 2.9  | 0.00  |
| Chronic lower GI conditions                 | 5342    | 0.4  | 34   | 1.0  | -0.08 | 14055.8   | 1.0  | 33   | 1.0  | 0.00  |
| Asthma                                      | 68321   | 4.7  | 321  | 9.6  | -0.19 | 145410.3  | 10.3 | 321  | 9.7  | 0.02  |
| Hypertension                                | 38192   | 2.6  | 110  | 3.3  | -0.04 | 41083.3   | 2.9  | 109  | 3.3  | -0.02 |
| Antihypertensive medication                 | 40598   | 2.8  | 177  | 5.3  | -0.13 | 70755.0   | 5.0  | 177  | 5.3  | -0.01 |
| Diabetes                                    | 25977   | 1.8  | 58   | 1.7  | 0.00  | 25324.0   | 1.8  | 58   | 1.7  | 0.00  |
| Insulin use                                 | 14638   | 1.0  | 32   | 1.0  | 0.00  | 14762.5   | 1.0  | 32   | 1.0  | 0.01  |
| Antidiabetic medication                     | 11977   | 0.8  | 37   | 1.1  | -0.03 | 17451.9   | 1.2  | 37   | 1.1  | 0.01  |
| Renal disease                               | 6126    | 0.4  | 20   | 0.6  | -0.03 | 8516.1    | 0.6  | 20   | 0.6  | 0.00  |

Cohen JM, Hernandez-Diaz S, Bateman BT, Park Y, Desai RJ, Gray KJ, et al. Placental complications associated with psychostimulant use in pregnancy. *Obstet Gynecol* 2017; 130. The authors provided this information as a supplement to their article.

©2017 American College of Obstetricians and Gynecologists.

|                                              |        |      |      |      |       |          |      |      |      |       |
|----------------------------------------------|--------|------|------|------|-------|----------|------|------|------|-------|
| Overweight or obese                          | 31329  | 2.1  | 101  | 3.0  | -0.06 | 43294.7  | 3.1  | 101  | 3.0  | 0.00  |
| Dyslipidemia                                 | 15179  | 1.0  | 42   | 1.3  | -0.02 | 17243.9  | 1.2  | 42   | 1.3  | 0.00  |
| Congestive heart failure                     | 1705   | 0.1  | *    | 0.1  | 0.00  | 1684.0   | 0.1  | *    | 0.1  | 0.00  |
| Cardiac arrhythmia                           | 9246   | 0.6  | 35   | 1.1  | -0.05 | 14661.9  | 1.0  | 35   | 1.1  | 0.00  |
| Ischemic Heart Disease                       | 2118   | 0.1  | *    | 0.2  | -0.01 | 2687.7   | 0.2  | *    | 0.2  | 0.00  |
| <b>Potential Indications for Stimulants†</b> |        |      |      |      |       |          |      |      |      |       |
| ADHD                                         | 10997  | 0.8  | 2025 | 60.8 | -1.71 | 847540.4 | 59.8 | 2022 | 60.8 | -0.02 |
| Migraine                                     | 165332 | 11.3 | 671  | 20.1 | -0.24 | 292212.1 | 20.6 | 670  | 20.1 | 0.01  |
| Bipolar disorder                             | 23901  | 1.6  | 550  | 16.5 | -0.54 | 253130.0 | 17.9 | 550  | 16.5 | 0.03  |
| Chronic fatigue syndrome                     | 56547  | 3.9  | 297  | 8.9  | -0.21 | 128069.5 | 9.0  | 297  | 8.9  | 0.00  |
| Narcolepsy                                   | 193    | 0.0  | 23   | 0.7  | -0.12 | 8891.8   | 0.6  | 21   | 0.6  | 0.00  |
| Epilepsy                                     | 17023  | 1.2  | 98   | 2.9  | -0.13 | 46320.5  | 3.3  | 98   | 2.9  | 0.02  |
| <b>Other Psychiatric Conditions</b>          |        |      |      |      |       |          |      |      |      |       |
| Psychosis                                    | 3225   | 0.2  | 30   | 0.9  | -0.09 | 15203.0  | 1.1  | 30   | 0.9  | 0.02  |
| Schizophrenia                                | 2703   | 0.2  | 23   | 0.7  | -0.08 | 11524.5  | 0.8  | 23   | 0.7  | 0.01  |
| Depression                                   | 96814  | 6.6  | 972  | 29.2 | -0.62 | 450954.8 | 31.8 | 969  | 29.1 | 0.06  |
| Personality disorder                         | 3467   | 0.2  | 49   | 1.5  | -0.13 | 23774.7  | 1.7  | 49   | 1.5  | 0.02  |
| Adjustment disorder                          | 17340  | 1.2  | 117  | 3.5  | -0.15 | 56384.1  | 4.0  | 116  | 3.5  | 0.03  |
| Anxiety disorder                             | 54289  | 3.7  | 633  | 19.0 | -0.50 | 266488.5 | 18.8 | 633  | 19.0 | -0.01 |
| Sleep disorder                               | 10183  | 0.7  | 117  | 3.5  | -0.20 | 51216.0  | 3.6  | 115  | 3.5  | 0.01  |
| Delirium                                     | 1128   | 0.1  | 14   | 0.4  | -0.07 | 7120.6   | 0.5  | 14   | 0.4  | 0.01  |
| <b>Other Medication Use</b>                  |        |      |      |      |       |          |      |      |      |       |
| Atypical antipsychotic                       | 18080  | 1.2  | 495  | 14.9 | -0.52 | 233238.6 | 16.5 | 495  | 14.9 | 0.04  |
| Typical antipsychotic                        | 1548   | 0.1  | 17   | 0.5  | -0.07 | 9122.5   | 0.6  | 17   | 0.5  | 0.02  |
| Antidepressant                               | 138074 | 9.5  | 1602 | 48.1 | -0.94 | 727158.8 | 51.3 | 1599 | 48.1 | 0.06  |
| Benzodiazepine                               | 45483  | 3.1  | 753  | 22.6 | -0.61 | 317283.4 | 22.4 | 750  | 22.5 | 0.00  |
| Other hypnotic                               | 61332  | 4.2  | 435  | 13.1 | -0.32 | 191097.4 | 13.5 | 433  | 13.0 | 0.01  |

Cohen JM, Hernandez-Diaz S, Bateman BT, Park Y, Desai RJ, Gray KJ, et al. Placental complications associated with psychostimulant use in pregnancy. *Obstet Gynecol* 2017; 130. The authors provided this information as a supplement to their article.

©2017 American College of Obstetricians and Gynecologists.

|                                          |             |           |             |           |                  |             |           |             |           |                  |
|------------------------------------------|-------------|-----------|-------------|-----------|------------------|-------------|-----------|-------------|-----------|------------------|
| Barbiturates                             | 21792       | 1.5       | 112         | 3.4       | -0.12            | 48687.8     | 3.4       | 112         | 3.4       | 0.00             |
| Anxiolytic                               | 6044        | 0.4       | 66          | 2.0       | -0.14            | 30391.1     | 2.1       | 66          | 2.0       | 0.01             |
| Opioid                                   | 323505      | 22.1      | 1457        | 43.7      | -0.47            | 628530.2    | 44.3      | 1454        | 43.7      | 0.01             |
| Triptan                                  | 16202       | 1.1       | 123         | 3.7       | -0.17            | 53400.3     | 3.8       | 123         | 3.7       | 0.00             |
| NSAID                                    | 244501      | 16.7      | 822         | 24.7      | -0.20            | 354493.5    | 25.0      | 822         | 24.7      | 0.01             |
| Acetaminophen                            | 389759      | 26.7      | 1508        | 45.3      | -0.40            | 650583.2    | 45.9      | 1505        | 45.2      | 0.01             |
| Anticonvulsant or lithium                | 18186       | 1.2       | 399         | 12.0      | -0.44            | 179967.0    | 12.7      | 398         | 12.0      | 0.02             |
| <b>Indication Severity Proxies</b>       | <b>Mean</b> | <b>SD</b> | <b>Mean</b> | <b>SD</b> | <b>St. Diff.</b> | <b>Mean</b> | <b>SD</b> | <b>Mean</b> | <b>SD</b> | <b>St. Diff.</b> |
| Number of ADHD diagnoses                 | 0.01        | 0.07      | 0.47        | 0.50      | -1.30            | 0.46        | 0.50      | 0.47        | 0.50      | -0.02            |
| Number of Bipolar disorder diagnoses     | 0.01        | 0.10      | 0.11        | 0.32      | -0.44            | 0.12        | 0.33      | 0.11        | 0.32      | 0.03             |
| Number of depression diagnoses           | 0.06        | 0.23      | 0.24        | 0.43      | -0.54            | 0.27        | 0.44      | 0.24        | 0.43      | 0.05             |
| Number of generic medications            | 4.26        | 3.87      | 8.87        | 5.42      | -0.98            | 9.06        | 6.22      | 8.86        | 5.40      | 0.03             |
| Number of generics excluding stimulants‡ | 1.68        | 2.39      | 3.96        | 3.58      | -0.75            | 4.08        | 3.96      | 3.95        | 3.58      | 0.03             |
| Number of emergency department visits‡   | 0.28        | 0.79      | 0.51        | 1.22      | -0.23            | 0.53        | 1.12      | 0.51        | 1.21      | 0.01             |
| Number of hospitalizations‡              | 0.04        | 0.24      | 0.04        | 0.22      | 0.00             | 0.05        | 0.24      | 0.04        | 0.22      | 0.00             |
| Number of outpatient visits‡             | 1.81        | 3.27      | 4.30        | 6.32      | -0.49            | 4.62        | 6.36      | 4.30        | 6.32      | 0.05             |

Covariates defined from LMP-90 to LMP+140, unless otherwise indicated

\*Actual numbers suppressed as required per data use agreement with the Centers for Medicare and Medicaid Services for counts <11

†1 or more ICD-9 diagnostic codes from LMP-90 to delivery

‡Healthcare utilization proxy variables defined during LMP-90 to LMP-1

**Appendix 4. Characteristics of Methylphenidate-Exposed and Unexposed Reference Group**

|                                  | Unadjusted                               |      |                                      |      |           | Adjusted                                 |      |                                         |      |           |
|----------------------------------|------------------------------------------|------|--------------------------------------|------|-----------|------------------------------------------|------|-----------------------------------------|------|-----------|
|                                  | No Stimulant Use<br>LMP-90 to<br>LMP+140 |      | MPH<br>Monotherapy<br>LMP to LMP+140 |      | St. Diff. | No Stimulant Use<br>LMP-90 to<br>LMP+140 |      | MPH<br>Monotherapy<br>LMP to<br>LMP+140 |      | St. Diff. |
|                                  | N                                        | %    | N                                    | %    |           | N                                        | %    | N                                       | %    |           |
| <b>Total</b>                     | 1461493                                  |      | 1515                                 |      |           | 1427252                                  |      | 1515                                    |      |           |
| <b>Calendar year at delivery</b> |                                          |      |                                      |      |           |                                          |      |                                         |      |           |
| 2000                             | 1811                                     | 0.1  | *                                    | 0.1  | 0.02      | 879.0                                    | 0.1  | *                                       | 0.1  | 0.00      |
| 2001                             | 92450                                    | 6.3  | 42                                   | 2.8  | 0.17      | 39452.9                                  | 2.8  | 42                                      | 2.8  | 0.00      |
| 2002                             | 108062                                   | 7.4  | 79                                   | 5.2  | 0.09      | 75053.6                                  | 5.3  | 79                                      | 5.2  | 0.00      |
| 2003                             | 139585                                   | 9.6  | 99                                   | 6.5  | 0.11      | 92294.6                                  | 6.5  | 99                                      | 6.5  | 0.00      |
| 2004                             | 167258                                   | 11.4 | 134                                  | 8.8  | 0.09      | 123676.8                                 | 8.7  | 134                                     | 8.8  | -0.01     |
| 2005                             | 167285                                   | 11.5 | 158                                  | 10.4 | 0.03      | 151281.5                                 | 10.6 | 158                                     | 10.4 | 0.01      |
| 2006                             | 168389                                   | 11.5 | 181                                  | 12.0 | -0.01     | 171792.3                                 | 12.0 | 181                                     | 12.0 | 0.00      |
| 2007                             | 153209                                   | 10.5 | 193                                  | 12.7 | -0.07     | 177415.0                                 | 12.4 | 193                                     | 12.7 | -0.01     |
| 2008                             | 154732                                   | 10.6 | 209                                  | 13.8 | -0.10     | 195788.3                                 | 13.7 | 209                                     | 13.8 | 0.00      |
| 2009                             | 157865                                   | 10.8 | 213                                  | 14.1 | -0.10     | 200803.8                                 | 14.1 | 213                                     | 14.1 | 0.00      |
| 2010                             | 150847                                   | 10.3 | 206                                  | 13.6 | -0.10     | 198814.2                                 | 13.9 | 206                                     | 13.6 | 0.01      |
| <b>Region</b>                    |                                          |      |                                      |      |           |                                          |      |                                         |      |           |
| Midwest                          | 445121                                   | 30.5 | 660                                  | 43.6 | -0.27     | 619029.5                                 | 43.4 | 660                                     | 43.6 | 0.00      |
| Northeast                        | 232711                                   | 15.9 | 301                                  | 19.9 | -0.10     | 283155.1                                 | 19.8 | 301                                     | 19.9 | 0.00      |
| South                            | 395275                                   | 27.1 | 420                                  | 27.7 | -0.02     | 406987.5                                 | 28.5 | 420                                     | 27.7 | 0.02      |
| West                             | 388386                                   | 26.6 | 134                                  | 8.8  | 0.48      | 118079.9                                 | 8.3  | 134                                     | 8.8  | -0.02     |
| <b>Age at delivery</b>           |                                          |      |                                      |      |           |                                          |      |                                         |      |           |
| ≤19                              | 351638                                   | 24.1 | 770                                  | 50.8 | -0.58     | 747808.2                                 | 52.4 | 770                                     | 50.8 | 0.03      |
| 20-24                            | 511333                                   | 35.0 | 317                                  | 20.9 | 0.32      | 287055.7                                 | 20.1 | 317                                     | 20.9 | -0.02     |

Cohen JM, Hernandez-Diaz S, Bateman BT, Park Y, Desai RJ, Gray KJ, et al. Placental complications associated with psychostimulant use in pregnancy. *Obstet Gynecol* 2017; 130. The authors provided this information as a supplement to their article.

©2017 American College of Obstetricians and Gynecologists.

|                                             |         |      |      |      |       |           |      |      |      |       |
|---------------------------------------------|---------|------|------|------|-------|-----------|------|------|------|-------|
| 25-29                                       | 343902  | 23.5 | 220  | 14.5 | 0.23  | 201043.0  | 14.1 | 220  | 14.5 | -0.01 |
| 30-34                                       | 162968  | 11.2 | 142  | 9.4  | 0.06  | 130620.1  | 9.2  | 142  | 9.4  | -0.01 |
| 35-39                                       | 72540   | 5.0  | 55   | 3.6  | 0.07  | 50557.6   | 3.5  | 55   | 3.6  | 0.00  |
| ≥40                                         | 19112   | 1.3  | 11   | 0.7  | 0.06  | 10167.5   | 0.7  | 11   | 0.7  | 0.00  |
| <b>Race/Ethnicity</b>                       |         |      |      |      |       |           |      |      |      |       |
| White                                       | 581811  | 39.8 | 1083 | 71.5 | -0.67 | 1036461.1 | 72.6 | 1083 | 71.5 | 0.03  |
| Black/African American                      | 491124  | 33.6 | 271  | 17.9 | 0.37  | 249225.0  | 17.5 | 271  | 17.9 | -0.01 |
| Hispanic/Latino                             | 219666  | 15.0 | 45   | 3.0  | 0.43  | 36679.6   | 2.6  | 45   | 3.0  | -0.02 |
| Asian/Pacific Islander                      | 52161   | 3.6  | *    | 0.4  | 0.23  | 4032.3    | 0.3  | *    | 0.4  | -0.02 |
| American Indian                             | 26047   | 1.8  | 33   | 2.2  | -0.03 | 30865.0   | 2.2  | 33   | 2.2  | 0.00  |
| Other                                       | 59443   | 4.1  | 30   | 2.0  | 0.12  | 26326.5   | 1.8  | 30   | 2.0  | -0.01 |
| Unknown                                     | 31241   | 2.1  | 47   | 3.1  | -0.06 | 43662.6   | 3.1  | 47   | 3.1  | 0.00  |
| <b>Placental-Complications Risk Factors</b> |         |      |      |      |       |           |      |      |      |       |
| Multiparous                                 | 1104366 | 75.6 | 651  | 43.0 | 0.70  | 594497.9  | 41.7 | 651  | 43.0 | -0.03 |
| Multifetal gestation                        | 41956   | 2.9  | 30   | 2.0  | 0.06  | 30005.1   | 2.1  | 30   | 2.0  | 0.01  |
| Tobacco use                                 | 52913   | 3.6  | 111  | 7.3  | -0.16 | 105857.9  | 7.4  | 111  | 7.3  | 0.00  |
| Alcohol use                                 | 8891    | 0.6  | 23   | 1.5  | -0.09 | 23509.1   | 1.7  | 23   | 1.5  | 0.01  |
| Other drug abuse or dependence              | 21991   | 1.5  | 58   | 3.8  | -0.15 | 57487.9   | 4.0  | 58   | 3.8  | 0.01  |
| Rheumatoid arthritis                        | 1565    | 0.1  | *    | 0.1  | -0.01 | 2338.3    | 0.2  | *    | 0.1  | 0.01  |
| Fibromyalgia                                | 14246   | 1.0  | 41   | 2.7  | -0.13 | 38009.9   | 2.7  | 41   | 2.7  | 0.00  |
| Chronic lower GI conditions                 | 5342    | 0.4  | 12   | 0.8  | -0.06 | 11787.7   | 0.8  | 12   | 0.8  | 0.00  |
| Asthma                                      | 68321   | 4.7  | 146  | 9.6  | -0.19 | 137370.1  | 9.6  | 146  | 9.6  | 0.00  |
| Hypertension                                | 38192   | 2.6  | 37   | 2.4  | 0.01  | 34466.6   | 2.4  | 37   | 2.4  | 0.00  |
| Antihypertensive medication                 | 40598   | 2.8  | 77   | 5.1  | -0.12 | 70111.2   | 4.9  | 77   | 5.1  | -0.01 |
| Diabetes                                    | 25977   | 1.8  | 26   | 1.7  | 0.00  | 25055.0   | 1.8  | 26   | 1.7  | 0.00  |
| Insulin use                                 | 14638   | 1.0  | 13   | 0.9  | 0.01  | 12845.7   | 0.9  | 13   | 0.9  | 0.00  |
| Antidiabetic medication                     | 11977   | 0.8  | 13   | 0.9  | 0.00  | 11637.3   | 0.8  | 13   | 0.9  | 0.00  |

Cohen JM, Hernandez-Diaz S, Bateman BT, Park Y, Desai RJ, Gray KJ, et al. Placental complications associated with psychostimulant use in pregnancy. *Obstet Gynecol* 2017; 130. The authors provided this information as a supplement to their article.

©2017 American College of Obstetricians and Gynecologists.



|                                              |        |      |     |      |       |          |      |     |      |       |
|----------------------------------------------|--------|------|-----|------|-------|----------|------|-----|------|-------|
| Renal disease                                | 6126   | 0.4  | *   | 0.4  | 0.00  | 5494.8   | 0.4  | *   | 0.4  | 0.00  |
| Overweight or obese                          | 31329  | 2.1  | 36  | 2.4  | -0.02 | 34038.3  | 2.4  | 36  | 2.4  | 0.00  |
| Dyslipidemia                                 | 15179  | 1.0  | 23  | 1.5  | -0.04 | 21109.6  | 1.5  | 23  | 1.5  | 0.00  |
| Congestive heart failure                     | 1705   | 0.1  | *   | 0.3  | -0.03 | 3517.6   | 0.3  | *   | 0.3  | 0.00  |
| Cardiac arrhythmia                           | 9246   | 0.6  | 11  | 0.7  | -0.01 | 11454.8  | 0.8  | 11  | 0.7  | 0.01  |
| Ischemic Heart Disease                       | 2118   | 0.1  | *   | 0.1  | 0.00  | 2131.5   | 0.2  | *   | 0.1  | 0.01  |
| <b>Potential Indications for Stimulants†</b> |        |      |     |      |       |          |      |     |      |       |
| ADHD                                         | 10997  | 0.8  | 841 | 55.5 | -1.54 | 791032.8 | 55.4 | 841 | 55.5 | 0.00  |
| Migraine                                     | 165332 | 11.3 | 257 | 17.0 | -0.16 | 244083.7 | 17.1 | 257 | 17.0 | 0.00  |
| Bipolar disorder                             | 23901  | 1.6  | 243 | 16.0 | -0.52 | 219066.2 | 15.4 | 243 | 16.0 | -0.02 |
| Chronic fatigue syndrome                     | 56547  | 3.9  | 107 | 7.1  | -0.14 | 101136.6 | 7.1  | 107 | 7.1  | 0.00  |
| Narcolepsy                                   | 193    | 0.0  | 19  | 1.3  | -0.16 | 12980.5  | 0.9  | 19  | 1.3  | -0.03 |
| Epilepsy                                     | 17023  | 1.2  | 39  | 2.6  | -0.10 | 34866.1  | 2.4  | 39  | 2.6  | -0.01 |
| <b>Other Psychiatric Conditions</b>          |        |      |     |      |       |          |      |     |      |       |
| Psychosis                                    | 3225   | 0.2  | 17  | 1.1  | -0.11 | 17775.6  | 1.3  | 17  | 1.1  | 0.01  |
| Schizophrenia                                | 2703   | 0.2  | 18  | 1.2  | -0.12 | 16892.6  | 1.2  | 18  | 1.2  | 0.00  |
| Depression                                   | 96814  | 6.6  | 451 | 29.8 | -0.63 | 444182.9 | 31.1 | 451 | 29.8 | 0.03  |
| Personality disorder                         | 3467   | 0.2  | 23  | 1.5  | -0.14 | 21787.1  | 1.5  | 23  | 1.5  | 0.00  |
| Adjustment disorder                          | 17340  | 1.2  | 86  | 5.7  | -0.25 | 87987.2  | 6.2  | 86  | 5.7  | 0.02  |
| Anxiety disorder                             | 54289  | 3.7  | 240 | 15.8 | -0.42 | 230401.3 | 16.1 | 240 | 15.8 | 0.01  |
| Sleep disorder                               | 10183  | 0.7  | 52  | 3.4  | -0.19 | 49435.9  | 3.5  | 52  | 3.4  | 0.00  |
| Delirium                                     | 1128   | 0.1  | *   | 0.3  | -0.06 | 4214.1   | 0.3  | *   | 0.3  | -0.01 |
| <b>Other Medication Use</b>                  |        |      |     |      |       |          |      |     |      |       |
| Atypical antipsychotic                       | 18080  | 1.2  | 259 | 17.1 | -0.57 | 225625.3 | 15.8 | 259 | 17.1 | -0.03 |
| Typical antipsychotic                        | 1548   | 0.1  | *   | 0.5  | -0.07 | 8332.1   | 0.6  | *   | 0.5  | 0.01  |
| Antidepressant                               | 138074 | 9.5  | 761 | 50.2 | -1.00 | 733574.6 | 51.4 | 761 | 50.2 | 0.02  |
| Benzodiazepine                               | 45483  | 3.1  | 234 | 15.5 | -0.44 | 224469.3 | 15.7 | 234 | 15.5 | 0.01  |

Cohen JM, Hernandez-Diaz S, Bateman BT, Park Y, Desai RJ, Gray KJ, et al. Placental complications associated with psychostimulant use in pregnancy. *Obstet Gynecol* 2017; 130. The authors provided this information as a supplement to their article.

©2017 American College of Obstetricians and Gynecologists.

|                                          |             |           |             |           |                  |             |           |             |           |                  |
|------------------------------------------|-------------|-----------|-------------|-----------|------------------|-------------|-----------|-------------|-----------|------------------|
| Other hypnotic                           | 61332       | 4.2       | 184         | 12.2      | -0.29            | 174022.9    | 12.2      | 184         | 12.2      | 0.00             |
| Barbiturates                             | 21792       | 1.5       | 38          | 2.5       | -0.07            | 36855.7     | 2.6       | 38          | 2.5       | 0.00             |
| Anxiolytic                               | 6044        | 0.4       | 31          | 2.1       | -0.15            | 29398.8     | 2.1       | 31          | 2.1       | 0.00             |
| Opioid                                   | 323505      | 22.1      | 515         | 34.0      | -0.27            | 490508.2    | 34.4      | 515         | 34.0      | 0.01             |
| Triptan                                  | 16202       | 1.1       | 45          | 3.0       | -0.13            | 43444.6     | 3.0       | 45          | 3.0       | 0.00             |
| NSAID                                    | 244501      | 16.7      | 364         | 24.0      | -0.18            | 342764.7    | 24.0      | 364         | 24.0      | 0.00             |
| Acetaminophen                            | 389759      | 26.7      | 549         | 36.2      | -0.21            | 522078.1    | 36.6      | 549         | 36.2      | 0.01             |
| Anticonvulsant or lithium                | 18186       | 1.2       | 192         | 12.7      | -0.46            | 157554.5    | 11.0      | 192         | 12.7      | -0.05            |
| <b>Indication Severity Proxies</b>       | <b>Mean</b> | <b>SD</b> | <b>Mean</b> | <b>SD</b> | <b>St. Diff.</b> | <b>Mean</b> | <b>SD</b> | <b>Mean</b> | <b>SD</b> | <b>St. Diff.</b> |
| Number of ADHD diagnoses                 | 0.01        | 0.07      | 0.43        | 0.50      | -1.21            | 0.43        | 0.49      | 0.43        | 0.50      | -0.02            |
| Number of Bipolar disorder diagnoses     | 0.01        | 0.10      | 0.11        | 0.31      | -0.42            | 0.10        | 0.30      | 0.11        | 0.31      | -0.02            |
| Number of depression diagnoses           | 0.06        | 0.23      | 0.26        | 0.44      | -0.57            | 0.27        | 0.44      | 0.26        | 0.44      | 0.03             |
| Number of generic medications            | 4.26        | 3.87      | 8.42        | 5.18      | -0.91            | 8.36        | 6.03      | 8.42        | 5.18      | -0.01            |
| Number of generics excluding stimulants‡ | 1.68        | 2.39      | 3.65        | 3.45      | -0.66            | 3.63        | 3.75      | 3.65        | 3.45      | -0.01            |
| Number of emergency department visits‡   | 0.28        | 0.79      | 0.45        | 1.12      | -0.18            | 0.46        | 1.02      | 0.45        | 1.12      | 0.00             |
| Number of hospitalizations‡              | 0.04        | 0.24      | 0.04        | 0.22      | 0.03             | 0.04        | 0.22      | 0.04        | 0.22      | 0.01             |
| Number of outpatient visits‡             | 1.81        | 3.27      | 5.26        | 8.97      | -0.51            | 5.20        | 8.43      | 5.26        | 8.97      | -0.01            |

Covariates defined from LMP-90 to LMP+140, unless otherwise indicated

\*Actual numbers suppressed as required per data use agreement with the Centers for Medicare and Medicaid Services for counts <11

†1 or more ICD-9 diagnostic codes from LMP-90 to delivery

‡Healthcare utilization proxy variables defined during LMP-90 to LMP-1

**Appendix 5. Characteristics of Atomoxetine-Exposed and Unexposed Reference Group**

|                                  | Unadjusted                               |      |                                      |      |           | Adjusted                                 |      |                                      |      |           |
|----------------------------------|------------------------------------------|------|--------------------------------------|------|-----------|------------------------------------------|------|--------------------------------------|------|-----------|
|                                  | No Stimulant Use<br>LMP-90 to<br>LMP+140 |      | ATX<br>Monotherapy<br>LMP to LMP+140 |      | St. Diff. | No Stimulant Use<br>LMP-90 to<br>LMP+140 |      | ATX<br>Monotherapy<br>LMP to LMP+140 |      | St. Diff. |
|                                  | N                                        | %    | N                                    | %    |           | N                                        | %    | N                                    | %    |           |
| <b>Total</b>                     | 1461493                                  |      | 453                                  |      |           | 1158784                                  |      | 452                                  |      |           |
| <b>Calendar year at delivery</b> |                                          |      |                                      |      |           |                                          |      |                                      |      |           |
| 2000                             | 1811                                     | 0.1  | 0                                    | 0.0  | 0.05      | 0.0                                      | 0.0  | 0                                    | 0.0  |           |
| 2001                             | 92450                                    | 6.3  | 0                                    | 0.0  | 0.37      | 0.0                                      | 0.0  | 0                                    | 0.0  |           |
| 2002                             | 108062                                   | 7.4  | 0                                    | 0.0  | 0.40      | 0.0                                      | 0.0  | 0                                    | 0.0  |           |
| 2003                             | 139585                                   | 9.6  | *                                    | 1.1  | 0.38      | 11486.3                                  | 1.0  | *                                    | 1.1  | -0.01     |
| 2004                             | 167258                                   | 11.4 | 73                                   | 16.1 | -0.14     | 188275.5                                 | 16.3 | 73                                   | 16.2 | 0.00      |
| 2005                             | 167285                                   | 11.5 | 97                                   | 21.4 | -0.27     | 246505.6                                 | 21.3 | 97                                   | 21.5 | 0.00      |
| 2006                             | 168389                                   | 11.5 | 76                                   | 16.8 | -0.15     | 197938.7                                 | 17.1 | 76                                   | 16.8 | 0.01      |
| 2007                             | 153209                                   | 10.5 | 56                                   | 12.4 | -0.06     | 140188.2                                 | 12.1 | 56                                   | 12.4 | -0.01     |
| 2008                             | 154732                                   | 10.6 | 49                                   | 10.8 | -0.01     | 121362.1                                 | 10.5 | 48                                   | 10.6 | 0.00      |
| 2009                             | 157865                                   | 10.8 | 49                                   | 10.8 | 0.00      | 124473.5                                 | 10.7 | 49                                   | 10.8 | 0.00      |
| 2010                             | 150847                                   | 10.3 | 48                                   | 10.6 | -0.01     | 128554.1                                 | 11.1 | 48                                   | 10.6 | 0.02      |
| <b>Region</b>                    |                                          |      |                                      |      |           |                                          |      |                                      |      |           |
| Midwest                          | 445121                                   | 30.5 | 146                                  | 32.2 | -0.04     | 380225.8                                 | 32.8 | 146                                  | 32.3 | 0.01      |
| Northeast                        | 232711                                   | 15.9 | 73                                   | 16.1 | -0.01     | 186708.8                                 | 16.1 | 73                                   | 16.2 | 0.00      |
| South                            | 395275                                   | 27.1 | 146                                  | 32.2 | -0.11     | 373858.4                                 | 32.3 | 145                                  | 32.1 | 0.00      |
| West                             | 388386                                   | 26.6 | 88                                   | 19.4 | 0.17      | 217991.1                                 | 18.8 | 88                                   | 19.5 | -0.02     |
| <b>Age at delivery</b>           |                                          |      |                                      |      |           |                                          |      |                                      |      |           |
| ≤19                              | 351638                                   | 24.1 | 176                                  | 38.9 | -0.32     | 441358.4                                 | 38.1 | 176                                  | 38.9 | -0.02     |
| 20-24                            | 511333                                   | 35.0 | 108                                  | 23.8 | 0.25      | 267823.0                                 | 23.1 | 108                                  | 23.9 | -0.02     |
| 25-29                            | 343902                                   | 23.5 | 86                                   | 19.0 | 0.11      | 227856.7                                 | 19.7 | 85                                   | 18.8 | 0.02      |

Cohen JM, Hernandez-Diaz S, Bateman BT, Park Y, Desai RJ, Gray KJ, et al. Placental complications associated with psychostimulant use in pregnancy. *Obstet Gynecol* 2017; 130. The authors provided this information as a supplement to their article.

©2017 American College of Obstetricians and Gynecologists.

|                                             |         |      |     |      |       |          |      |     |      |       |
|---------------------------------------------|---------|------|-----|------|-------|----------|------|-----|------|-------|
| 30-34                                       | 162968  | 11.2 | 45  | 9.9  | 0.04  | 116894.3 | 10.1 | 45  | 10.0 | 0.00  |
| 35-39                                       | 72540   | 5.0  | 31  | 6.8  | -0.08 | 84696.8  | 7.3  | 31  | 6.9  | 0.02  |
| ≥40                                         | 19112   | 1.3  | *   | 1.6  | -0.02 | 20154.7  | 1.7  | *   | 1.6  | 0.01  |
| <b>Race/Ethnicity</b>                       |         |      |     |      |       |          |      |     |      |       |
| White                                       | 581811  | 39.8 | 351 | 77.5 | -0.83 | 928045.4 | 80.1 | 350 | 77.4 | 0.07  |
| Black/African American                      | 491124  | 33.6 | 62  | 13.7 | 0.48  | 143600.3 | 12.4 | 62  | 13.7 | -0.04 |
| Hispanic/Latino                             | 219666  | 15.0 | 14  | 3.1  | 0.43  | 27524.9  | 2.4  | 14  | 3.1  | -0.04 |
| Asian/Pacific Islander                      | 52161   | 3.6  | *   | 1.1  | 0.16  | 9231.0   | 0.8  | *   | 1.1  | -0.03 |
| American Indian                             | 26047   | 1.8  | *   | 0.9  | 0.08  | 9644.6   | 0.8  | *   | 0.9  | -0.01 |
| Other                                       | 59443   | 4.1  | *   | 2.0  | 0.12  | 21073.8  | 1.8  | *   | 2.0  | -0.01 |
| Unknown                                     | 31241   | 2.1  | *   | 1.8  | 0.03  | 19664.0  | 1.7  | *   | 1.8  | -0.01 |
| <b>Placental-Complications Risk Factors</b> |         |      |     |      |       |          |      |     |      |       |
| Multiparous                                 | 1104366 | 75.6 | 249 | 55.0 | 0.44  | 648595.2 | 56.0 | 249 | 55.1 | 0.02  |
| Multifetal gestation                        | 41956   | 2.9  | 13  | 2.9  | 0.00  | 36353.7  | 3.1  | 13  | 2.9  | 0.02  |
| Tobacco use                                 | 52913   | 3.6  | 38  | 8.4  | -0.20 | 100906.8 | 8.7  | 38  | 8.4  | 0.01  |
| Alcohol use                                 | 8891    | 0.6  | 18  | 4.0  | -0.23 | 49853.7  | 4.3  | 18  | 4.0  | 0.02  |
| Other drug abuse or dependence              | 21991   | 1.5  | 53  | 11.7 | -0.42 | 131057.8 | 11.3 | 53  | 11.7 | -0.01 |
| Rheumatoid arthritis                        | 1565    | 0.1  | 0   | 0.0  | 0.05  | 0.0      | 0.0  | 0   | 0.0  |       |
| Fibromyalgia                                | 14246   | 1.0  | 11  | 2.4  | -0.11 | 29571.0  | 2.6  | 11  | 2.4  | 0.01  |
| Chronic lower GI conditions                 | 5342    | 0.4  | *   | 1.6  | -0.12 | 20915.5  | 1.8  | *   | 1.6  | 0.02  |
| Asthma                                      | 68321   | 4.7  | 34  | 7.5  | -0.12 | 90716.6  | 7.8  | 34  | 7.5  | 0.01  |
| Hypertension                                | 38192   | 2.6  | 12  | 2.7  | 0.00  | 32051.5  | 2.8  | 12  | 2.7  | 0.01  |
| Antihypertensive medication                 | 40598   | 2.8  | 40  | 8.8  | -0.26 | 108507.6 | 9.4  | 39  | 8.6  | 0.03  |
| Diabetes                                    | 25977   | 1.8  | *   | 2.2  | -0.03 | 28354.0  | 2.5  | *   | 2.2  | 0.02  |
| Insulin use                                 | 14638   | 1.0  | *   | 2.0  | -0.08 | 24677.1  | 2.1  | *   | 2.0  | 0.01  |
| Antidiabetic medication                     | 11977   | 0.8  | *   | 1.8  | -0.08 | 22982.3  | 2.0  | *   | 1.8  | 0.02  |
| Renal disease                               | 6126    | 0.4  | *   | 0.7  | -0.03 | 8472.9   | 0.7  | *   | 0.7  | 0.01  |

Cohen JM, Hernandez-Diaz S, Bateman BT, Park Y, Desai RJ, Gray KJ, et al. Placental complications associated with psychostimulant use in pregnancy. *Obstet Gynecol* 2017; 130. The authors provided this information as a supplement to their article.

©2017 American College of Obstetricians and Gynecologists.

|                                              |        |      |     |      |       |          |      |     |      |       |
|----------------------------------------------|--------|------|-----|------|-------|----------|------|-----|------|-------|
| Overweight or obese                          | 31329  | 2.1  | 13  | 2.9  | -0.05 | 33100.9  | 2.9  | 13  | 2.9  | 0.00  |
| Dyslipidemia                                 | 15179  | 1.0  | 11  | 2.4  | -0.11 | 30303.1  | 2.6  | 11  | 2.4  | 0.01  |
| Congestive heart failure                     | 1705   | 0.1  | 0   | 0.0  | 0.05  | 0.0      | 0.0  | 0   | 0.0  |       |
| Cardiac arrhythmia                           | 9246   | 0.6  | *   | 1.6  | -0.09 | 18832.4  | 1.6  | *   | 1.6  | 0.01  |
| Ischemic Heart Disease                       | 2118   | 0.1  | 0   | 0.0  | 0.05  | 0.0      | 0.0  | 0   | 0.0  |       |
| <b>Potential Indications for Stimulants†</b> |        |      |     |      |       |          |      |     |      |       |
| ADHD                                         | 10997  | 0.8  | 204 | 45.0 | -1.24 | 489818.1 | 42.3 | 203 | 44.9 | -0.05 |
| Migraine                                     | 165332 | 11.3 | 95  | 21.0 | -0.26 | 255706.1 | 22.1 | 95  | 21.0 | 0.03  |
| Bipolar disorder                             | 23901  | 1.6  | 102 | 22.5 | -0.68 | 239458.9 | 20.7 | 101 | 22.4 | -0.04 |
| Chronic fatigue syndrome                     | 56547  | 3.9  | 48  | 10.6 | -0.26 | 128553.9 | 11.1 | 48  | 10.6 | 0.02  |
| Narcolepsy                                   | 193    | 0.0  | 0   | 0.0  | 0.01  | 0.0      | 0.0  | 0   | 0.0  |       |
| Epilepsy                                     | 17023  | 1.2  | 18  | 4.0  | -0.18 | 45312.3  | 3.9  | 18  | 4.0  | 0.00  |
| <b>Other Psychiatric Conditions</b>          |        |      |     |      |       |          |      |     |      |       |
| Psychosis                                    | 3225   | 0.2  | 14  | 3.1  | -0.23 | 28502.3  | 2.5  | 14  | 3.1  | -0.04 |
| Schizophrenia                                | 2703   | 0.2  | *   | 1.6  | -0.15 | 17393.4  | 1.5  | *   | 1.6  | 0.00  |
| Depression                                   | 96814  | 6.6  | 173 | 38.2 | -0.82 | 471946.0 | 40.7 | 173 | 38.3 | 0.05  |
| Personality disorder                         | 3467   | 0.2  | 12  | 2.7  | -0.20 | 28494.5  | 2.5  | 12  | 2.7  | -0.01 |
| Adjustment disorder                          | 17340  | 1.2  | 30  | 6.6  | -0.28 | 78945.7  | 6.8  | 30  | 6.6  | 0.01  |
| Anxiety disorder                             | 54289  | 3.7  | 102 | 22.5 | -0.58 | 272118.5 | 23.5 | 101 | 22.4 | 0.03  |
| Sleep disorder                               | 10183  | 0.7  | 20  | 4.4  | -0.24 | 55824.8  | 4.8  | 20  | 4.4  | 0.02  |
| Delirium                                     | 1128   | 0.1  | 0   | 0.0  | 0.04  | 0.0      | 0.0  | 0   | 0.0  |       |
| <b>Other Medication Use</b>                  |        |      |     |      |       |          |      |     |      |       |
| Atypical antipsychotic                       | 18080  | 1.2  | 122 | 26.9 | -0.79 | 290923.6 | 25.1 | 121 | 26.8 | -0.04 |
| Typical antipsychotic                        | 1548   | 0.1  | *   | 1.1  | -0.13 | 12003.6  | 1.0  | *   | 1.1  | -0.01 |
| Antidepressant                               | 138074 | 9.5  | 276 | 60.9 | -1.28 | 763961.1 | 65.9 | 275 | 60.8 | 0.11  |
| Benzodiazepine                               | 45483  | 3.1  | 76  | 16.8 | -0.47 | 212796.4 | 18.4 | 76  | 16.8 | 0.04  |
| Other hypnotic                               | 61332  | 4.2  | 76  | 16.8 | -0.42 | 201749.8 | 17.4 | 75  | 16.6 | 0.02  |

Cohen JM, Hernandez-Diaz S, Bateman BT, Park Y, Desai RJ, Gray KJ, et al. Placental complications associated with psychostimulant use in pregnancy. *Obstet Gynecol* 2017; 130. The authors provided this information as a supplement to their article.

©2017 American College of Obstetricians and Gynecologists.

|                                          |             |           |             |           |                  |             |           |             |           |                  |
|------------------------------------------|-------------|-----------|-------------|-----------|------------------|-------------|-----------|-------------|-----------|------------------|
| Barbiturates                             | 21792       | 1.5       | 17          | 3.8       | -0.14            | 46593.9     | 4.0       | 17          | 3.8       | 0.01             |
| Anxiolytic                               | 6044        | 0.4       | 14          | 3.1       | -0.21            | 33593.5     | 2.9       | 13          | 2.9       | 0.00             |
| Opioid                                   | 323505      | 22.1      | 168         | 37.1      | -0.33            | 456240.5    | 39.4      | 168         | 37.2      | 0.05             |
| Triptan                                  | 16202       | 1.1       | 16          | 3.5       | -0.16            | 46921.5     | 4.1       | 16          | 3.5       | 0.03             |
| NSAID                                    | 244501      | 16.7      | 104         | 23.0      | -0.16            | 284385.3    | 24.5      | 104         | 23.0      | 0.04             |
| Acetaminophen                            | 389759      | 26.7      | 183         | 40.4      | -0.29            | 492901.3    | 42.5      | 183         | 40.5      | 0.04             |
| Anticonvulsant or lithium                | 18186       | 1.2       | 89          | 19.7      | -0.63            | 204282.9    | 17.6      | 88          | 19.5      | -0.05            |
| <b>Indication Severity Proxies</b>       | <b>Mean</b> | <b>SD</b> | <b>Mean</b> | <b>SD</b> | <b>St. Diff.</b> | <b>Mean</b> | <b>SD</b> | <b>Mean</b> | <b>SD</b> | <b>St. Diff.</b> |
| Number of ADHD diagnoses                 | 0.01        | 0.07      | 0.35        | 0.48      | -1.00            | 0.32        | 0.47      | 0.35        | 0.48      | -0.05            |
| Number of Bipolar disorder diagnoses     | 0.01        | 0.10      | 0.17        | 0.38      | -0.58            | 0.15        | 0.36      | 0.17        | 0.37      | -0.04            |
| Number of depression diagnoses           | 0.06        | 0.23      | 0.33        | 0.47      | -0.74            | 0.36        | 0.48      | 0.33        | 0.47      | 0.05             |
| Number of generic medications            | 4.26        | 3.87      | 9.88        | 6.39      | -1.06            | 10.12       | 6.92      | 9.85        | 6.35      | 0.04             |
| Number of generics excluding stimulants‡ | 1.68        | 2.39      | 4.47        | 4.40      | -0.79            | 4.61        | 4.39      | 4.45        | 4.39      | 0.04             |
| Number of emergency department visits‡   | 0.28        | 0.79      | 0.40        | 1.02      | -0.13            | 0.41        | 0.90      | 0.40        | 1.02      | 0.01             |
| Number of hospitalizations‡              | 0.04        | 0.24      | 0.07        | 0.34      | -0.08            | 0.06        | 0.29      | 0.07        | 0.34      | -0.01            |
| Number of outpatient visits‡             | 1.81        | 3.27      | 5.45        | 7.94      | -0.60            | 5.42        | 8.22      | 5.45        | 7.94      | 0.00             |

Covariates defined from LMP-90 to LMP+140, unless otherwise indicated

\*Actual numbers suppressed as required per data use agreement with the Centers for Medicare and Medicaid Services for counts <11

†1 or more ICD-9 diagnostic codes from LMP-90 to delivery

‡Healthcare utilization proxy variables defined during LMP-90 to LMP-1

**Appendix 6. Characteristics of Women With Monotherapy Continuation After 20 Weeks of Gestation Compared With Discontinuation**

|                                  | Unadjusted                   |      |                           |      |           | Adjusted                     |      |                           |      |           |
|----------------------------------|------------------------------|------|---------------------------|------|-----------|------------------------------|------|---------------------------|------|-----------|
|                                  | Discontinuation<br>≤ LMP+140 |      | Continuation<br>> LMP+140 |      | St. Diff. | Discontinuation<br>≤ LMP+140 |      | Continuation<br>> LMP+140 |      | St. Diff. |
|                                  | N                            | %    | N                         | %    |           | N                            | %    | N                         | %    |           |
| <b>Total</b>                     | 3946                         |      | 1353                      |      |           | 3930                         |      | 1350                      |      |           |
| <b>Calendar year at delivery</b> |                              |      |                           |      |           |                              |      |                           |      |           |
| 2000                             | 0                            | 0.0  | *                         | 0.1  | -0.04     | 0.0                          | 0.0  | 0                         | 0.0  |           |
| 2001                             | 57                           | 1.4  | 11                        | 0.8  | 0.06      | 30.3                         | 0.8  | 11                        | 0.8  | 0.00      |
| 2002                             | 120                          | 3.0  | 27                        | 2.0  | 0.07      | 81.5                         | 2.1  | 27                        | 2.0  | 0.00      |
| 2003                             | 174                          | 4.4  | 43                        | 3.2  | 0.06      | 130.1                        | 3.3  | 43                        | 3.2  | 0.01      |
| 2004                             | 294                          | 7.5  | 78                        | 5.8  | 0.07      | 233.3                        | 5.9  | 78                        | 5.8  | 0.01      |
| 2005                             | 412                          | 10.4 | 110                       | 8.1  | 0.08      | 321.2                        | 8.2  | 110                       | 8.2  | 0.00      |
| 2006                             | 469                          | 11.9 | 128                       | 9.5  | 0.08      | 371.4                        | 9.5  | 128                       | 9.5  | 0.00      |
| 2007                             | 504                          | 12.8 | 155                       | 11.5 | 0.04      | 437.6                        | 11.1 | 155                       | 11.5 | -0.01     |
| 2008                             | 555                          | 14.1 | 206                       | 15.2 | -0.03     | 607.7                        | 15.5 | 206                       | 15.3 | 0.01      |
| 2009                             | 673                          | 17.1 | 265                       | 19.6 | -0.07     | 756.9                        | 19.3 | 265                       | 19.6 | -0.01     |
| 2010                             | 688                          | 17.4 | 329                       | 24.3 | -0.17     | 960.0                        | 24.4 | 327                       | 24.2 | 0.00      |
| <b>Region</b>                    |                              |      |                           |      |           |                              |      |                           |      |           |
| Midwest                          | 1715                         | 43.5 | 638                       | 47.2 | -0.07     | 1857.7                       | 47.3 | 636                       | 47.1 | 0.00      |
| Northeast                        | 605                          | 15.3 | 183                       | 13.5 | 0.05      | 541.4                        | 13.8 | 183                       | 13.6 | 0.01      |
| South                            | 1301                         | 33.0 | 435                       | 32.2 | 0.02      | 1248.1                       | 31.8 | 434                       | 32.2 | -0.01     |
| West                             | 325                          | 8.2  | 97                        | 7.2  | 0.04      | 282.8                        | 7.2  | 97                        | 7.2  | 0.00      |
| <b>Age at delivery</b>           |                              |      |                           |      |           |                              |      |                           |      |           |
| ≤19                              | 1772                         | 44.9 | 362                       | 26.8 | 0.39      | 1068.0                       | 27.2 | 362                       | 26.8 | 0.01      |
| 20-24                            | 946                          | 24.0 | 375                       | 27.7 | -0.09     | 1081.4                       | 27.5 | 375                       | 27.8 | -0.01     |
| 25-29                            | 704                          | 17.8 | 335                       | 24.8 | -0.17     | 980.1                        | 24.9 | 334                       | 24.7 | 0.00      |

Cohen JM, Hernandez-Diaz S, Bateman BT, Park Y, Desai RJ, Gray KJ, et al. Placental complications associated with psychostimulant use in pregnancy. *Obstet Gynecol* 2017; 130. The authors provided this information as a supplement to their article.

©2017 American College of Obstetricians and Gynecologists.

|                                             |      |      |      |      |       |        |      |      |      |       |
|---------------------------------------------|------|------|------|------|-------|--------|------|------|------|-------|
| 30-34                                       | 349  | 8.8  | 184  | 13.6 | -0.15 | 527.4  | 13.4 | 183  | 13.6 | 0.00  |
| 35-39                                       | 144  | 3.7  | 84   | 6.2  | -0.12 | 240.2  | 6.1  | 83   | 6.2  | 0.00  |
| ≥40                                         | 31   | 0.8  | 13   | 1.0  | -0.02 | 32.9   | 0.8  | 13   | 1.0  | -0.01 |
| <b>Race/Ethnicity</b>                       |      |      |      |      |       |        |      |      |      |       |
| White                                       | 3052 | 77.3 | 1129 | 83.4 | -0.15 | 3276.7 | 83.4 | 1127 | 83.5 | 0.00  |
| Black/African American                      | 528  | 13.4 | 98   | 7.2  | 0.20  | 291.6  | 7.4  | 98   | 7.3  | 0.01  |
| Hispanic/Latino                             | 96   | 2.4  | 31   | 2.3  | 0.01  | 87.7   | 2.2  | 31   | 2.3  | 0.00  |
| Asian/Pacific Islander                      | 9    | 0.2  | *    | 0.4  | -0.04 | 16.0   | 0.4  | *    | 0.4  | 0.01  |
| American Indian                             | 67   | 1.7  | 29   | 2.1  | -0.03 | 82.3   | 2.1  | 29   | 2.2  | 0.00  |
| Other                                       | 80   | 2.0  | 27   | 2.0  | 0.00  | 80.2   | 2.0  | 27   | 2.0  | 0.00  |
| Unknown                                     | 114  | 2.9  | 33   | 2.4  | 0.03  | 95.5   | 2.4  | 33   | 2.4  | 0.00  |
| <b>Placental-Complications Risk Factors</b> |      |      |      |      |       |        |      |      |      |       |
| Multiparous                                 | 2032 | 51.5 | 887  | 65.6 | -0.29 | 2560.5 | 65.2 | 886  | 65.6 | -0.01 |
| Multifetal gestation                        | 92   | 2.3  | 22   | 1.6  | 0.05  | 69.2   | 1.8  | 22   | 1.6  | 0.01  |
| Tobacco use                                 | 324  | 8.2  | 174  | 12.9 | -0.15 | 510.4  | 13.0 | 174  | 12.9 | 0.00  |
| Alcohol use                                 | 70   | 1.8  | 16   | 1.2  | 0.05  | 44.9   | 1.1  | 16   | 1.2  | 0.00  |
| Other drug abuse or dependence              | 193  | 4.9  | 61   | 4.5  | 0.02  | 168.0  | 4.3  | 61   | 4.5  | -0.01 |
| Rheumatoid arthritis                        | *    | 0.1  | *    | 0.4  | -0.05 | 14.4   | 0.4  | *    | 0.3  | 0.01  |
| Fibromyalgia                                | 96   | 2.4  | 53   | 3.9  | -0.09 | 153.2  | 3.9  | 53   | 3.9  | 0.00  |
| Chronic lower GI conditions                 | 40   | 1.0  | 13   | 1.0  | 0.01  | 47.8   | 1.2  | 13   | 1.0  | 0.03  |
| Asthma                                      | 381  | 9.7  | 120  | 8.9  | 0.03  | 360.6  | 9.2  | 120  | 8.9  | 0.01  |
| Hypertension                                | 110  | 2.8  | 49   | 3.6  | -0.05 | 133.1  | 3.4  | 49   | 3.6  | -0.01 |
| Antihypertensive medication                 | 205  | 5.2  | 89   | 6.6  | -0.06 | 245.2  | 6.2  | 88   | 6.5  | -0.01 |
| Diabetes                                    | 73   | 1.9  | 21   | 1.6  | 0.02  | 52.7   | 1.3  | 21   | 1.6  | -0.02 |
| Insulin use                                 | 39   | 1.0  | 15   | 1.1  | -0.01 | 40.9   | 1.0  | 15   | 1.1  | -0.01 |
| Antidiabetic medication                     | 45   | 1.1  | 13   | 1.0  | 0.02  | 35.7   | 0.9  | 13   | 1.0  | -0.01 |
| Renal disease                               | 20   | 0.5  | *    | 0.7  | -0.02 | 26.1   | 0.7  | *    | 0.7  | 0.00  |

Cohen JM, Hernandez-Diaz S, Bateman BT, Park Y, Desai RJ, Gray KJ, et al. Placental complications associated with psychostimulant use in pregnancy. *Obstet Gynecol* 2017; 130. The authors provided this information as a supplement to their article.

©2017 American College of Obstetricians and Gynecologists.



|                                              |      |      |     |      |       |        |      |     |      |       |
|----------------------------------------------|------|------|-----|------|-------|--------|------|-----|------|-------|
| Overweight or obese                          | 115  | 2.9  | 35  | 2.6  | 0.02  | 107.8  | 2.7  | 35  | 2.6  | 0.01  |
| Dyslipidemia                                 | 59   | 1.5  | 17  | 1.3  | 0.02  | 51.2   | 1.3  | 17  | 1.3  | 0.00  |
| Congestive heart failure                     | *    | 0.1  | *   | 0.2  | -0.02 | *      | 0.2  | *   | 0.2  | -0.01 |
| Cardiac arrhythmia                           | 39   | 1.0  | 14  | 1.0  | 0.00  | 39.3   | 1.0  | 14  | 1.0  | 0.00  |
| Ischemic Heart Disease                       | *    | 0.2  | *   | 0.2  | 0.00  | *      | 0.1  | *   | 0.2  | -0.01 |
| <b>Potential Indications for Stimulants†</b> |      |      |     |      |       |        |      |     |      |       |
| ADHD                                         | 2184 | 55.4 | 886 | 65.5 | -0.21 | 2573.2 | 65.5 | 883 | 65.4 | 0.00  |
| Migraine                                     | 743  | 18.8 | 280 | 20.7 | -0.05 | 789.5  | 20.1 | 280 | 20.7 | -0.02 |
| Bipolar disorder                             | 666  | 16.9 | 229 | 16.9 | 0.00  | 673.4  | 17.1 | 228 | 16.9 | 0.01  |
| Chronic fatigue syndrome                     | 334  | 8.5  | 118 | 8.7  | -0.01 | 340.8  | 8.7  | 118 | 8.7  | 0.00  |
| Narcolepsy                                   | 27   | 0.7  | 15  | 1.1  | -0.05 | 41.8   | 1.1  | 15  | 1.1  | 0.00  |
| Epilepsy                                     | 117  | 3.0  | 38  | 2.8  | 0.01  | 108.7  | 2.8  | 38  | 2.8  | 0.00  |
| <b>Other Psychiatric Conditions</b>          |      |      |     |      |       |        |      |     |      |       |
| Psychosis                                    | 49   | 1.2  | 12  | 0.9  | 0.03  | 38.8   | 1.0  | 12  | 0.9  | 0.01  |
| Schizophrenia                                | 39   | 1.0  | *   | 0.7  | 0.04  | 24.1   | 0.6  | *   | 0.7  | -0.01 |
| Depression                                   | 1184 | 30.0 | 412 | 30.5 | -0.01 | 1211.9 | 30.8 | 410 | 30.4 | 0.01  |
| Personality disorder                         | 62   | 1.6  | 22  | 1.6  | 0.00  | 66.3   | 1.7  | 22  | 1.6  | 0.00  |
| Adjustment disorder                          | 187  | 4.7  | 46  | 3.4  | 0.07  | 139.1  | 3.5  | 46  | 3.4  | 0.01  |
| Anxiety disorder                             | 672  | 17.0 | 303 | 22.4 | -0.14 | 872.8  | 22.2 | 303 | 22.4 | -0.01 |
| Sleep disorder                               | 138  | 3.5  | 51  | 3.8  | -0.01 | 144.8  | 3.7  | 51  | 3.8  | 0.00  |
| Delirium                                     | 17   | 0.4  | *   | 0.2  | 0.05  | *      | 0.1  | *   | 0.2  | -0.01 |
| <b>Other Medication Use</b>                  |      |      |     |      |       |        |      |     |      |       |
| Atypical antipsychotic                       | 686  | 17.4 | 190 | 14.0 | 0.09  | 545.6  | 13.9 | 190 | 14.1 | -0.01 |
| Typical antipsychotic                        | 24   | 0.6  | *   | 0.4  | 0.02  | 16.9   | 0.4  | *   | 0.4  | 0.00  |
| Antidepressant                               | 1959 | 49.7 | 680 | 50.3 | -0.01 | 1969.9 | 50.1 | 679 | 50.3 | 0.00  |
| Benzodiazepine                               | 663  | 16.8 | 400 | 29.6 | -0.31 | 1144.4 | 29.1 | 398 | 29.5 | -0.01 |
| Other hypnotic                               | 485  | 12.3 | 210 | 15.5 | -0.09 | 616.6  | 15.7 | 208 | 15.4 | 0.01  |

Cohen JM, Hernandez-Diaz S, Bateman BT, Park Y, Desai RJ, Gray KJ, et al. Placental complications associated with psychostimulant use in pregnancy. *Obstet Gynecol* 2017; 130. The authors provided this information as a supplement to their article.

©2017 American College of Obstetricians and Gynecologists.

|                                          |             |           |             |           |                  |             |           |             |           |                  |
|------------------------------------------|-------------|-----------|-------------|-----------|------------------|-------------|-----------|-------------|-----------|------------------|
| Barbiturates                             | 129         | 3.3       | 38          | 2.8       | 0.03             | 104.0       | 2.7       | 38          | 2.8       | -0.01            |
| Anxiolytic                               | 87          | 2.2       | 24          | 1.8       | 0.03             | 72.2        | 1.8       | 24          | 1.8       | 0.00             |
| Opioid                                   | 1451        | 36.8      | 689         | 50.9      | -0.29            | 1990.8      | 50.7      | 687         | 50.9      | 0.00             |
| Triptan                                  | 124         | 3.1       | 60          | 4.4       | -0.07            | 168.4       | 4.3       | 60          | 4.4       | -0.01            |
| NSAID                                    | 911         | 23.1      | 379         | 28.0      | -0.11            | 1096.8      | 27.9      | 378         | 28.0      | 0.00             |
| Acetaminophen                            | 1546        | 39.2      | 694         | 51.3      | -0.25            | 1994.1      | 50.7      | 692         | 51.3      | -0.01            |
| Anticonvulsant or lithium                | 498         | 12.6      | 182         | 13.5      | -0.02            | 518.8       | 13.2      | 182         | 13.5      | -0.01            |
| <b>Indication Severity Proxies</b>       | <b>Mean</b> | <b>SD</b> | <b>Mean</b> | <b>SD</b> | <b>St. Diff.</b> | <b>Mean</b> | <b>SD</b> | <b>Mean</b> | <b>SD</b> | <b>St. Diff.</b> |
| Number of ADHD diagnoses                 | 0.44        | 0.50      | 0.46        | 0.50      | -0.05            | 0.46        | 0.50      | 0.47        | 0.50      | -0.01            |
| Number of Bipolar disorder diagnoses     | 0.12        | 0.32      | 0.11        | 0.31      | 0.04             | 0.11        | 0.31      | 0.11        | 0.31      | 0.00             |
| Number of depression diagnoses           | 0.26        | 0.44      | 0.24        | 0.43      | 0.03             | 0.25        | 0.43      | 0.25        | 0.43      | 0.00             |
| Number of generic medications            | 0.46        | 1.14      | 0.57        | 1.27      | -0.09            | 9.19        | 5.52      | 9.22        | 5.61      | -0.01            |
| Number of generics excluding stimulants‡ | 8.70        | 5.39      | 9.21        | 5.61      | -0.09            | 4.32        | 3.75      | 4.31        | 3.85      | 0.00             |
| Number of emergency department visits‡   | 3.78        | 3.54      | 4.31        | 3.84      | -0.14            | 0.56        | 1.34      | 0.57        | 1.28      | -0.01            |
| Number of hospitalizations‡              | 0.04        | 0.23      | 0.05        | 0.25      | -0.05            | 0.06        | 0.28      | 0.05        | 0.25      | 0.02             |
| Number of outpatient visits‡             | 4.84        | 7.60      | 4.18        | 6.46      | 0.09             | 4.22        | 5.80      | 4.19        | 6.46      | 0.00             |

Covariates defined from LMP-90 to LMP+140, unless otherwise indicated

\*Actual numbers suppressed as required per data use agreement with the Centers for Medicare and Medicaid Services for counts <11

†1 or more ICD-9 diagnostic codes from LMP-90 to delivery

‡Healthcare utilization proxy variables defined during LMP-90 to LMP-1
